# Supplementary material
Source: ML conference proceedings conference paper supplement (https://aclanthology.org/D19-1612)
Supplement: Attachment [file D19-1612.Attachment.zip]

Archive with 2 entries (1 files):
- supp_appendix/
- supp_appendix/appendix.pdf
